# Supplementary material
Source: publisher figshare collection journal article supplement (https://sage.figshare.com/ndownloader/files/21050235)
Supplement: Supplementary file 1 [file 21050235]

**Table 1S:** Basic characteristics of included human studies (n=20)

| Author, year             | Country       | Study design          | Population                                               | Age                                        | Gender               | Effect measures                                                                                                                              | Main findings                                                                                                                                                                                                                                                                                                                                                        |
|--------------------------|---------------|-----------------------|----------------------------------------------------------|--------------------------------------------|----------------------|----------------------------------------------------------------------------------------------------------------------------------------------|----------------------------------------------------------------------------------------------------------------------------------------------------------------------------------------------------------------------------------------------------------------------------------------------------------------------------------------------------------------------|
| Barry et al., 2016       | Canada        | Cross-sectional study | Type 2 diabetes mellitus (T2DM) (n=24)<br>Control (n=22) | T2DM (57.8±10.9)<br>Control (53.4±10.7)    | F (n=34)<br>M (n=12) | Interleukin-6 (IL-6), interleukin-10 (IL-10), and tumour necrosis factor- $\alpha$ (TNF- $\alpha$ ).                                         | Type 2 diabetes mellitus (T2DM) group had significantly elevated levels of tumour necrosis factor (TNF)- $\alpha$ and interleukin (IL)-6 when compared to the control group. In addition, there was no significant difference in IL-10 levels between the two groups. However, the anti-inflammatory activity of IL-10 was lower in T2DM group compared to controls. |
| Cipolletta et al., 2005  | UK            | Cross-sectional study | T2DM (n=27)<br>Control (n=12)                            | T2DM (50.6±16.1)<br>Control (51.8±7.9)     | F (n=20)<br>M (n=19) | Monocyte chemoattractant protein-1 (MCP-1).                                                                                                  | The expression of the scavenger receptor, CD36 on monocytes was significantly increased in the T2DM group compared to the controls group.                                                                                                                                                                                                                            |
| Corralles et al., 2007   | Spain         | Cross-sectional study | T2DM (n=55)<br>Control (n=8)                             | T2DM (64±8)<br>Control (64±9)              | All males            | 63<br>IL-6, TNF- $\alpha$ .                                                                                                                  | There was no significant difference in the levels of IL-1 $\beta$ , IL-6, and TNF- $\alpha$ released by monocytes and dendritic cells from T2DM and the control group. However, sub-analysis of CD16 <sup>+</sup> monocytes and CD16 <sup>+</sup> dendritic cells showed significantly reduced the production of IL-6 and TNF- $\alpha$ , respectively.              |
| Dai et al., 2015         | China         | Cross-sectional study | T2DM (n=17)<br>Control (n=12)<br>Obese-T2DM (n=15)       | T2DM (44.25±6.75)<br>Control (42.5±6.5)    | F (n=23)<br>M (n=21) | Glycated haemoglobin (HbA1c).                                                                                                                | Obese-T2DM individuals had a significant increase in IFN- $\gamma$ than T2DM individuals. Additionally, T2DM and Obese-T2DM individuals had increased IFN- $\gamma$ than control.                                                                                                                                                                                    |
| Eftekharian et al., 2016 | Iran          | Cross-sectional study | T2DM (n=75)<br>Control (n=72)                            | Not reported                               | Not reported         | Total cholesterol (TC), triglyceride (TG), high-density lipoprotein (HDL), low-density lipoprotein (LDL), Neutrophil-lymphocyte ratio (NLR). | Total cholesterol, triglycerides, and low-density lipoprotein (LDL) levels were significantly increased in the T2DM group compared to the controls                                                                                                                                                                                                                   |
| Freire et al., 2017      | United States | Cross-sectional study | T2DM (n=83)<br>Control (n=83)                            | T2DM (56.83±9.84)<br>Control (40.62±11.46) | F (n=85)<br>M (n=81) | IL-10, IL-1 $\beta$ , TNF- $\alpha$ , nuclear factor-kappa- $\beta$ (NF-k $\beta$ ), HbA1c                                                   | Increased frequency of neutrophils and elevated levels of cholesterol were reported in the T2DM group compared to controls.                                                                                                                                                                                                                                          |

|                                 |                |                       |                                |                                            |                        |                                                      |                                                                                                                                                                                                                                                                               |
|---------------------------------|----------------|-----------------------|--------------------------------|--------------------------------------------|------------------------|------------------------------------------------------|-------------------------------------------------------------------------------------------------------------------------------------------------------------------------------------------------------------------------------------------------------------------------------|
| Gacka et al., 2010              | Poland         | Cross-sectional study | T2DM (n=58)<br>Control (n=22)  | T2DM (51.75±13.75)<br>Control (41.25±9.75) | F (n=42)<br>M (n=38)   | TNF- $\alpha$                                        | Expression of TNF- $\alpha$ and IL-8 genes was observed in only two members of the control group and undetectable in T2DM.                                                                                                                                                    |
| Ip et al., 2016                 | USA            | Cross-sectional study | T2DM (n=22)<br>Control (n=29)  | T2DM (50.6±16.1)<br>Control (51.8±7.9)     | F (n=32)<br>M (n=19)   | IL-10, IL-1 $\beta$ , TNF- $\alpha$                  | Elevated levels of IL-4, IL-5, IL-10, IL-13, and TNF- $\alpha$ were observed in individuals with T2DM compared to controls.                                                                                                                                                   |
| Jagannathan-Bogdan et al., 2011 | United States  | Cross-sectional study | T2DM (n=18)<br>Control (n=16)  | T2DM (49.95±8.75)<br>Control (45.25±6.75)  | F (n=22)<br>M (n=12)   | IL-17 and interferon- $\gamma$                       | Individuals with T2DM had significantly increased the frequency of Th17 cells and IFN- $\gamma$ levels when compared to controls.                                                                                                                                             |
| Lin et al., 2018                | China          | Cohort                | T2DM (n=20)<br>Control (n=20)  | T2DM (51.25±5.71)<br>Control (54.3±7.39)   | F (n=15)<br>M (n=25)   | NF-k $\beta$ , HbA1c, MCP-1, TC, TG                  | The expression of monocyte chemoattractant protein (MCP) -1 on monocytes as well as its serum levels and nuclear factor kappa-light-chain-enhancer of activated B cells (NF-k $\beta$ ) signaling were significantly increased in T2DM group compared to controls.            |
| Malandrino et al., 2015         | Spain          | Cohort                | T2DM (n=11)<br>Control (n=36)  | T2DM (66.1±8.6)<br>Control (61.6±10.6)     | F (n=21)<br>M (n=26)   | IL-6, HDL, TC, TG, full blood glucose (FBG)          | There was increased expression of carnitine palmitoyltransferase (CPT1A) on adipose tissue-resident macrophages compared to adipocytes. There were no significant differences in anti-inflammatory markers including IL-10 and IL-4 in cells with or without palmitate CPT1A. |
| Moreno-Navarrete 2009           | Spain          | Cross-sectional study | T2DM (n=135)<br>Control (n=94) | T2DM (58.18±10.7)<br>Control (49.8±11.3)   | All 229 males          | NF-k $\beta$ , IL-6, IL-8.                           | T2DM group showed increased levels of neutrophils when compared to the control group. There was a reduction in the expression of IL-6, IL-8, and MCP-1 in LPS-stimulated THP-1 cells relative to LPS-stimulated cells in the diabetic patient compared to control.            |
| Mraz et al., 2011               | Czech Republic | Cross-sectional study | T2DM (n=12)<br>Control (n=15)  | T2DM (57.7±9.34)<br>Control (54.1±6.97)    | F (n=12)<br>M (n=15)   | C-reactive protein (CRP), TNF- $\alpha$ , IL-6, IL-8 | Individuals with T2DM had increased serum triglycerides, C-reactive protein (CRP), TNF- $\alpha$ , IL-6, and IL-8 levels when compared to the control group.                                                                                                                  |
| Ozturk et al., 2013             | Turkey         | Cross-sectional study | T2DM (n=97)<br>Control (n=218) | T2DM (66.78±4.12)<br>Control (72.81±6.17)  | F (n=148)<br>M (n=167) | NLR, CRP                                             | There was statistical significance in the levels neutrophil-lymphocyte ratio (NLR) and CRP.                                                                                                                                                                                   |

|                               |             |                       |                                 |                                          |                            |                                                                                            |                                                                                                                                                                                                                                                                                              |
|-------------------------------|-------------|-----------------------|---------------------------------|------------------------------------------|----------------------------|--------------------------------------------------------------------------------------------|----------------------------------------------------------------------------------------------------------------------------------------------------------------------------------------------------------------------------------------------------------------------------------------------|
| Shiny et al., 2014            | India       | Cross-sectional study | T2DM (n=237)<br>Control (n=286) | T2DM (47±8)<br>Control (39±7)            | Not reported               | HbA1c, TC, TG, NLR, HDL, LDL, Homeostatic model assessment of insulin resistance (HOMA-IR) | Individuals with T2DM had a significantly higher NLR, blood pressure and serum cholesterol levels compared to individuals with impaired glucose tolerance (IGT) and controls. However, there was no significant difference in monocytes, basophils and eosinophils levels amongst all groups |
| Shurtz-Swirskeit et al., 2001 | Israel      | Cross-sectional study | T2DM (n=18)<br>Control (n=16)   | T2DM (51.5±10)<br>Control (48.35±5.45)   | F (n=18)<br>M (n=16)       | Not reported                                                                               | Individuals with T2DM had significantly elevated peripheral polymorphonuclear leukocyte count compared to controls.                                                                                                                                                                          |
| Ulu et al., 2013              | Turkey      | Cross-sectional       | T2DM (n=58)<br>Control (n=45)   | T2DM (50.31±5.2)<br>Control (48.35±5.45) | F (n=69)<br>M (n=34)       | NLR                                                                                        | Individuals with T2DM had significantly elevated NLR compared to the controls.                                                                                                                                                                                                               |
| Vaidyula et al., 2006         | USA         | Cross-sectional study | T2DM (n=10)<br>Control (n=5)    | T2DM (38.3±2.7)<br>Control (39.6±2)      | F (n=8)<br>M (n=7)         | Not reported                                                                               | Individuals with T2DM had increased monocytes tissue factor when compared to controls.                                                                                                                                                                                                       |
| Van Diepen et al., 2017       | Netherlands | Cross-sectional study | T2DM (n=45)<br>Control (n=72)   | T2DM (60.3±1.6)<br>Control (54.2±1)      | F (n=56.68)<br>M (n=58.32) | HbA1c                                                                                      | Individuals with T2DM had increased circulating succinate levels compared to the controls. The expression of succinate receptor-1 was increased in M2 compared to M1 macrophages this was improved following differentiation of monocytes to macrophages.                                    |
| Yang et al., 2012             | China       | Cross-sectional study | T2DM (n=28)<br>Control (n=20)   | T2DM (52±8)<br>Control (49±6)            | F (n=23)<br>M (n=25)       | IL-6                                                                                       | Individuals with T2DM had significantly increased monocytes (CD14 <sup>+</sup> CD16 <sup>+</sup> ) derived IL-6 and CRP levels when compared to controls.                                                                                                                                    |

**Table 2S:** Characteristics of included animal studies (n=8)

| Author, year            | Country       | Strain, model                                                                                                                                           | Age          | Duration on diet (Weeks) | Effect measure                                             | Main findings                                                                                                                                                                                                                                                                                                                                                                                                                                                                                                                |
|-------------------------|---------------|---------------------------------------------------------------------------------------------------------------------------------------------------------|--------------|--------------------------|------------------------------------------------------------|------------------------------------------------------------------------------------------------------------------------------------------------------------------------------------------------------------------------------------------------------------------------------------------------------------------------------------------------------------------------------------------------------------------------------------------------------------------------------------------------------------------------------|
| Buras et al., 2015      | USA           | Male C57BL/6/J<br>Diabetes induced model of obesity (DIO)<br>Induced by HFD (60% kcal derived from fats)                                                | 6            | Not reported             | TNF- $\alpha$                                              | High- fat diet (HFD)-fed mice developed obesity and slight hyperglycaemia. Interestingly, the levels of tumour necrosis factor- $\alpha$ (TNF- $\alpha$ ) and interleukin-1 $\beta$ (IL-1 $\beta$ ) remained the same despite the reversal of hyperglycaemia. Proinsulin-secreting macrophages had increased adipose visceral macrophages that were undetectable in the control group.                                                                                                                                       |
| Van Diepen et al., 2017 | Netherland    | Sucnr <sup>+/+</sup><br>Male C57BL/6 background<br>DIO induced by HFD (60% kcal derived from fats)                                                      | 8-12         | 2-16                     | IL-1 $\beta$ ,<br>IL-6,<br>TNF- $\alpha$ ,<br>and<br>MCP-1 | Mouse adipose tissue on HFD showed increased expression of succinate receptor 1 (Sucnr1) mRNA in matured adipocyte compared to a stromal vascular fraction. Adipose tissue of HFD-fed mice showed a reduced number of macrophage markers F4/80 and CD68 compared to HFD-fed wild type (WT) mice.                                                                                                                                                                                                                             |
| Dror et al., 2017       | Switzerland   | C57BL/6N.<br>DIO induced by HFD (58% kcal derived from fats, 25% carbohydrate, 16% protein)                                                             | 4            | 20 - 25                  | IL-1 $\beta$ ,<br>IL-6, and<br>TNF- $\alpha$               | HFD-feeding increased circulating levels of IL-1 $\beta$ in WT mice. In Il1b <sup>-/-</sup> mice IL-1 $\beta$ was undetectable. Increased peritoneal macrophages and genes that code for inflammatory markers including IL-1 $\beta$ in ornamental fat.                                                                                                                                                                                                                                                                      |
| Hong et al., 2009       | USA           | Male C57BL/6<br>DIO<br>Induced by HFD (55% Kcal derived from fats)                                                                                      | 10           | 3                        | IL-6,<br>TNF- $\alpha$                                     | The deletion of macrophages resulted in decreased levels of neuroprotection D1 (NPD1) in mice wounds. Treatment db/db-macrophages by NPD1 decreased TNF- $\alpha$ , leukotriene-B4 (LTB4), and 8-isoprostane levels compared to the control. In addition, IL-10 increased as a result of administration of NPD1 and NPD1-treated db/db-macrophages. Macrophage depletion caused by dichloroethylene-diphosphonate (Clodronate) loaded liposomes therapy resulted in a decrease of F4/80 macrophage in db/db mice skin wound. |
| Jia et al., 2014        | United States | Male C57BL/6<br>Cre-conditional toll-like receptor (Tlr4) induced by electroporation of bacterial artificial chromosomes with Tlr4 into EL350 bacteria. | Not reported | 6-7                      | TNF- $\alpha$                                              | Circulating levels and mRNA expression of TNF- $\alpha$ , IL-6, IL-1 $\beta$ , and monocyte chemoattractant protein 1 (MCP-1), were significantly decreased in obese Tlr4 <sup>LKO</sup> mice white adipose tissue (WAT) compared to HFD-fed controls. The decrease in TNF- $\alpha$ level was induced by LPS treatment. Additionally, WAT of HFD-fed Tlr4 <sup>LKO</sup> mice, mRNA expression of CD11c, M1 macrophage marker, also decreased.                                                                              |
| Kimball et al., 2017    | United States | Male C57BL/6<br>DIO<br>Induced by HFD derived from 60% kcal of fats).                                                                                   | Not reported | 10-12                    | IL-1 $\beta$                                               | Mixed lineage leukaemia-1 (Mll1) gene expression was significantly increased in macrophages following an injury. Mll1 expression was elevated in T2DM monocytes compared to the control group, showing an abnormal expression of MLL1 in prediabetic wound macrophages                                                                                                                                                                                                                                                       |

|                                   |                                                                                                                                                                         |                     |                 |                                                  |                                                                                                                                                                                                                                                                                                                                                                                                       |
|-----------------------------------|-------------------------------------------------------------------------------------------------------------------------------------------------------------------------|---------------------|-----------------|--------------------------------------------------|-------------------------------------------------------------------------------------------------------------------------------------------------------------------------------------------------------------------------------------------------------------------------------------------------------------------------------------------------------------------------------------------------------|
| Lee et al., Korea<br>2016         | C57BL/6<br>Autophagy related-7<br>(Atg7) conditional<br>knockout (cKO) mice, was<br>obtained by crossing Atg7<br>conditional wild type mice<br>(cWT) with Lys-Cre mice. | Not<br>report<br>ed | Not<br>reported | IL-1 $\beta$ ,<br>IL-6,<br>TNF $\alpha$          | Low Atg7 mRNA expression in peritoneal macrophage of Atg7 cKO mice. Atg7 cKO ob/ob mice glucose levels were above normal range compared to Atg7 cWT ob/ob mice. Lipopolysaccharide (LPS) induced low secretion of IL-1 $\beta$ . LPS coupled with palmitic acid treatment significantly increased the secretion of IL-1 $\beta$ in macrophages of Atg7 cKO mice compared to Atg7 to the control mice. |
| Prattichizo et Spain<br>al., 2018 | Male C57BL/6<br>DIO induced by the admin<br>of streptozotocin and citrate<br>buffer.                                                                                    | Not<br>report<br>ed | 25              | IL-6, IL-<br>10, TNF-<br>$\alpha$ , and<br>MCP-1 | Non-macrophagic, non-endothelial (ECs) showed increased p21 and transforming growth factor- $\beta$ expression. Both macrophages and ECs showed expression senescence-associated secretory phenotype compatible markers. In comparison to the control group, circulating angiogenic cells showed a significant increase in the mRNA expression of p16 and IL-8.                                       |

**Table 3S:** Clinical and metabolic characteristics of included human studies

| Table S3: Clinical and metabolic characteristics of included human studies |     |              |                             |                      |                                   |                     |                     |                      |  |
|----------------------------------------------------------------------------|-----|--------------|-----------------------------|----------------------|-----------------------------------|---------------------|---------------------|----------------------|--|
| Author, year                                                               | SS  | Gender       | Anthropometric measurements |                      | Cardiovascular risk factors       |                     |                     |                      |  |
|                                                                            |     | Male (%)     | BMI                         | Waist circumference  | FBG                               | DBP                 | SBP                 | Insulin              |  |
| Barry et al., 2016                                                         | 46  | 12 (26.1)    | 2 [-1.19, 5.19]             | 6.8 [-2.79, 16.39]   | 4.91[3.72, 6.11] <sup>a</sup>     | Not reported        | Not reported        | Not reported         |  |
| Cipolletta et al., 2005                                                    | 40  | 19 (47,5)    | 0.90 [-3.49, 5.29]          | Not reported         | Not reported                      | 4.00 [-0.54, 8.54]  | 9.00 [0.23, 17.77]  | Not reported         |  |
| Corralles et al., 2007                                                     | 63  | 63 (100)     | -7.90 [-11.15, -4.65]       | Not reported         | 1.48 [0.69, 2.26] <sup>a</sup>    | Not reported        | Not reported        | 2.68 [1.80, 3.56]    |  |
| Dai et al., 2015                                                           | 29  | 15 (51.7)    | 1.05 [0.23, 1.87]           | Not reported         | Not determined                    | Not reported        | Not reported        | Not reported         |  |
| Freire et al., 2017                                                        | 166 | 81 (48.9)    | Not reported                | Not reported         | Not reported                      | Not reported        | Not reported        | Not reported         |  |
| Gacka et al., 2010                                                         | 80  | 38 (47,5)    | 6.94 [4.90, 8.98]           | 0.14 [0.09, 0.19]    | 1.47 [0.92, 2.01] <sup>a</sup>    | 7.21 [1.72, 12.70]  | 16.91 [8.10, 25.72] | -1.66 [-2.93, -0.38] |  |
| Ip et al., 2016                                                            | 51  | 19 (37,3)    | -2.0 [-4.34, 0.34]          | Not reported         | 1.51 [0.88, 2.15] <sup>a</sup>    | Not reported        | Not reported        | Not reported         |  |
| Jagannathan-Bogdan et al., 2011                                            | 34  | 12 (35,3)    | 13.25 [8.09, 18.41]         | Not reported         | Not reported                      | Not reported        | Not reported        | Not reported         |  |
| Lin et al., 2018                                                           | 40  | 25 (62.3)    | 1.11 [0.79, 1.43]           | Not reported         | 5.32 [3.94, 6.69] <sup>a</sup>    | 4.91 [3.47,6.33]    | 3.32 [0.76, 5.83]   | 2.03 [1.07, 2.99]    |  |
| Malandrino et al., 2015                                                    | 47  | 26 (55.3)    | -0.25 [-0.88, 0.38]         | -2.80 [-4.39, -1.21] | 16.19 [12.71, 19.68] <sup>a</sup> | -1.00 [-4.07, 2.07] | 0.00 [-5.00, 5.00]  | Not reported         |  |
| Moreno-Navarrete 2009                                                      | 229 | 229 (100)    | 1.88 [0.88, 2.88]           | 0.05 [0.03, 0.07]    | 0.98 [0.70, 1.25] <sup>a</sup>    | Not reported        | Not reported        | 0.80 [0.29, 1.30]    |  |
| Mraz et al., 2011                                                          | 29  | 0 (0)        | 28.20 [22.98, 33.42]        | Not reported         | 1.37 [0.52, 2.23] <sup>a</sup>    | Not reported        | Not reported        | Not reported         |  |
| Ozturk et al., 2013                                                        | 315 | 167 (53)     | Not reported                | Not reported         | 2.09 [1.80, 2.38] <sup>a</sup>    | Not reported        | Not reported        | Not reported         |  |
| Shinny et al., 2014                                                        | 523 | Not reported | 1.50 [0.77, 2.23]           | 4.60 [2.79, 6.41]    | 1.63 [1.43, 1.83]                 | 2.20 [0.48, 3.92]   | 9.40[6.35, 12.45]   | Not reported         |  |
| Shurtz-Swirskeit et al., 2001                                              | 34  | 16 (47,1)    | Not reported                | Not reported         | 11.32 [8.38, 14.25] <sup>a</sup>  | Not reported        | Not reported        | Not reported         |  |
| Ulu et al., 2013                                                           | 103 | 34 (33)      | 0.08 [-1.50, 1.66]          | Not reported         | 1.48 [1.04, 1.92] <sup>a</sup>    | Not reported        | Not reported        | 0.14 [-0.60, 0.88]   |  |
| Vaidyula et al., 2006                                                      | 15  | 7 (46,7)     | 0.10 [-1.70, 1.90]          | Not reported         | -2.44 [-3.92, -0.96] <sup>a</sup> | Not reported        | Not reported        | Not reported         |  |

|                         |     |                |                     |                 |                                 |                    |                    |              |
|-------------------------|-----|----------------|---------------------|-----------------|---------------------------------|--------------------|--------------------|--------------|
| Van Diepen et al., 2017 | 117 | Not determined | 2.9 [2.63, 3.17]    | 0.08[0.07,0.09] | 20.21[17.57,22.9] <sup>a</sup>  | Not reported       | Not reported       | Not reported |
| Yang et al 2012         | 48  | 25 (52,1)      | -0.70 [-2.12, 0.72] | Not reported    | 0.47 [-0.12, 1.05] <sup>a</sup> | 0.00 [-4.93, 4.93] | 2.00 [-2.25, 6.25] | Not reported |

Footnote

Data presented as Mean Difference, 95% CI except for data indicated by <sup>a</sup> Standardized Mean Difference, 95%CI.

SS: Sample size, FBG: Fasting blood glucose, SBP: systolic blood pressure, DBP: diastolic blood pressure

**Table 4S:** Primary and secondary outcomes and the effect measure of included human studies

| Study                    | IL-6                 | TNF- $\alpha$       | IL-1 $\beta$        | TG                   | TC                     | LDL                    | HDL                    | CRP                  | HbA1c                             | WBC | M  | N  | NLR |
|--------------------------|----------------------|---------------------|---------------------|----------------------|------------------------|------------------------|------------------------|----------------------|-----------------------------------|-----|----|----|-----|
| Barry et al., 2016       | 0.00<br>[0.26, 0.26] | 0.80<br>[0.18, 1.4] | NR                  | NR                   | NR                     | NR                     | NR                     | NR                   | NR                                | NR  | NR | NR | NR  |
| Cipolletta et al., 2005  | NR                   | NR                  | NR                  | NR                   | -0.03<br>[-0.71, 0.65] | -0.31<br>[-0.99, 0.37] | -1.74<br>[-2.54, 0.95] | NR<br>-              | NR                                | NR  | NR | NR | NR  |
| Corralles et al., 2007   | -0.08 [-0.82, 0.67]  | -0.15 [-0.9, 0.59]  | -0.50 [-1.26, 0.25] | NR                   | NR                     | NR                     | NR                     | 0.56<br>[0.32, 0.81] | 1.90<br>[1.10, 2.70] <sup>a</sup> | NR  | NR | NR | NR  |
| Freire et al., 2017      | NR                   | 0.05 [-0.26, 0.59]  | -0.00 [-0.31, 0.30] | NR                   | NR                     | NR                     | NR                     | NR                   | NR                                | NR  | NR | NR | NR  |
| Eftekharian et al., 2016 | NR                   | NR                  | NR                  | 1.26<br>[0.91, 1.61] | 2.44<br>[2.01, 2.87]   | 0.64<br>[0.31, 0.97]   | -0.20<br>[-0.52, 0.13] | NR                   | NR                                | NR  | NR | NR | NR  |
| Gacka et al., 2010       | NR                   | NR                  | NR                  | 0.71<br>[0.20, 1.21] | NR                     | NR                     | -0.68<br>[-1.19, 0.18] | NR<br>-              | 2.50<br>[2.05, 2.95] <sup>a</sup> | NR  | NR | NR | NR  |
| Ip et al., 2016          | NR                   | NR                  | NR                  | NR                   | NR                     | NR                     | NR                     | NR                   | 2.85<br>[2.16, 3.54] <sup>a</sup> | NR  | NR | NR | NR  |

|                            |                      |                      |    |                       |                         |                         |                        |                       |                                      |                        |                       |                        |                                     |
|----------------------------|----------------------|----------------------|----|-----------------------|-------------------------|-------------------------|------------------------|-----------------------|--------------------------------------|------------------------|-----------------------|------------------------|-------------------------------------|
| Lin et al., 2018           | NR                   | NR                   | NR | 1.86<br>[1.11, 2.62]  | 1.55<br>[0.84, 2.27]    | 2.34<br>[1.51, 3.16]    | NR                     | NR                    | 11.86<br>[10.54, 13.18] <sup>a</sup> | NR                     | NR                    | NR                     | NR                                  |
| Malandrino et al., 2015    | 0.72<br>[0.12, 1.31] | NR                   | NR | 3.03<br>[2.10, 3.96]  | NR                      | NR                      | NR                     | NR                    | NR                                   | NR                     | NR                    | NR                     | NR                                  |
| Moreno-Navarrete 2009      | Not reported         | 0.20 [-0.07, 0.46]   | NR | 1.27<br>[0.99, 1.56]  | NR                      | NR                      | NR                     | NR                    | 1.50<br>[1.19, 1.81] <sup>a</sup>    | NR                     | NR                    | -0.19<br>[-0.76, 0.39] | NR                                  |
| Mraz et al., 2011          | 1.14<br>[0.31, 1.96] | 1.23<br>[0.39, 2.06] | NR | 1.36<br>[0.51, 2.22]  | -0.28<br>[-1.05, 0.48]  | NR                      | NR                     | 1.49<br>[0.62, 2.36]  | 3.14<br>[1.88, 4.40] <sup>a</sup>    | NR                     | NR                    | NR                     | NR                                  |
| Ozturk et al., 2013        | NR                   | NR                   | NR | NR                    | -0.06<br>[-0.30, 0.18]  | 0.10<br>[-0.15, 0.34]   | -0.88<br>[-1.13, 0.63] | 0.03<br>[-0.71, 0.78] | NR                                   | 0.56<br>[0.31, 0.80]   | NR                    | 0.25<br>[0.01, 0.49]   | -0.14<br>[-0.32, 0.04] <sup>a</sup> |
| Shinny et al., 2014        | NR                   | NR                   | NR | 0.17<br>[-0.00, 0.34] | 0.48<br>[0.30, 0.65]    | 0.09<br>[-0.09, 0.26]   | -0.04<br>[-0.21, 0.13] | NR                    | 0.70<br>[0.55, 0.85] <sup>a</sup>    | NR                     | -0.15<br>[-.32, 0.03] | 0.77<br>[0.59, 0.95]   | 0.70<br>[0.55, 0.85] <sup>a</sup>   |
| Shurtz-Swirsk et al., 2001 | NR                   | NR                   | NR | 2.32<br>[1.43, 3.22]  | 0.41 [-0.27, 1.09]      | NR                      | NR                     | NR                    | 2.22 [2.12, 2.32]                    | NR                     | NR                    | NR                     | NR                                  |
| Ulu et al., 2013           | NR                   | NR                   | NR | 0.47<br>[0.08, 0.87]  | NR                      | 0.08<br>[-0.31, 0.47]   | -0.35<br>[-0.74, 0.04] | NR                    | NR                                   | NR                     | NR                    | NR                     | NR                                  |
| Vaidyula et al., 2         | NR                   | NR                   | NR | NR                    | NR                      | NR                      | NR                     | NR                    | NR                                   | NR                     | NR                    | NR                     | NR                                  |
| Van Diepen et al., 2017    | NR                   | NR                   | NR | 4.47<br>[3.78, 5.16]  | -1.99<br>[-2.44, -1.53] | -4.75<br>[-5.47, -4.02] | ND                     | NR                    | ND                                   | NR                     | NR                    | NR                     | NR                                  |
| Yang et al 2012            | 2.97<br>[2.12, 3.81] | NR                   | NR | 0.47<br>[-0.11, 1.05] | 0.00<br>[-0.57, 0.57]   | -0.66<br>[-1.25, 0.07]  | -0.28<br>[-0.85, 0.30] | 1.21<br>[0.58, 1.83]  | 0.20<br>[-0.11, 0.51] <sup>a</sup>   | -0.42<br>[-1.00, 0.16] | 0.00<br>[-0.57, 0.57] | 0.62<br>[0.35, 0.89]   | NR                                  |

Footnote:

Data presented as Standardised Mean Difference (SMD), 95% CI, <sup>a</sup> represent data reported as a mean difference

NR: Not reported, ND: Not determined

**Table 5S:** Summary of findings. Type 2 diabetes mellitus (T2DM) compared to Control (normoglycaemia)

**Type 2 Diabetes mellitus (T2DM) compared to Control (normoglycaemia) in T2DM**

**Patient or population:** T2DM

**Comparison:** Control (normoglycaemia)

| Outcomes                                   | Anticipated absolute effects* (95% CI)                                          |                                                         | Relative effect (95% CI) | No of participants (studies)    | Certainty of the evidence (GRADE)  | Comments |
|--------------------------------------------|---------------------------------------------------------------------------------|---------------------------------------------------------|--------------------------|---------------------------------|------------------------------------|----------|
|                                            | Risk with Control (normoglycaemia)                                              | Risk with Type 2 Diabetes mellitus (T2DM)               |                          |                                 |                                    |          |
| Monocytes activation                       | The mean monocytes activation ranged from <b>-0.4195 - 66.5 SD</b>              | MD <b>0.47 SD higher</b> (0.1 higher to 0.84 higher)    | -                        | 991 (7 observational studies)   | ⊕○○○<br>○<br>VERY LOW<br>a,b,c,d   |          |
| Cardiovascular disease risk factors (CVDs) | The mean Cardiovascular disease risk factors ranged from <b>1.05- 207.73 SD</b> | mean <b>0.37 SD higher</b> (0.13 higher to 0.61 higher) | -                        | 6867 (13 observational studies) | ⊕○○○<br>○<br>VERY LOW<br>a,d,e,f,g |          |
| Animal narrative                           | no data pooling was carried out in all animal studies <sup>h</sup>              |                                                         |                          | (7 RCTs)                        | -                                  |          |

\***The risk in the intervention group** (and its 95% confidence interval) is based on the assumed risk in the comparison group and the **relative effect** of the intervention (and its 95% CI).

**CI:** Confidence interval; **MD:** Mean difference

**GRADE Working Group grades of evidence**

**High certainty:** We are very confident that the true effect lies close to that of the estimate of the effect

**Moderate certainty:** We are moderately confident in the effect estimate: The true effect is likely to be close to the estimate of the effect, but there is a possibility that it is substantially different

**Low certainty:** Our confidence in the effect estimate is limited: The true effect may be substantially different from the estimate of the effect

**Very low certainty:** We have very little confidence in the effect estimate: The true effect is likely to be substantially different from the estimate of effect

**Table 6Sa:** Quality ratings and risk of bias assessment for included studies assigned to each study using the Downs and Black (DB) scale.

| Author                          | Reporting/10            | External<br>score/3         | validity | Internal<br>score/7    | validity | Selection bias score/6   | Total<br>score/26 | Numerical | Rating |
|---------------------------------|-------------------------|-----------------------------|----------|------------------------|----------|--------------------------|-------------------|-----------|--------|
| Barry et al., 2016              | 8                       | 0                           |          | 3                      |          | 3                        | 14                |           | Poor   |
| Cipoletta et al., 2005          | 7                       | 1                           |          | 3                      |          | 2                        | 13                |           | Poor   |
| Corralles et al., 2007          | 6                       | 0                           |          | 4                      |          | 0                        | 10                |           | Poor   |
| Dai et al., 2015                | 9                       | 3                           |          | 4                      |          | 2                        | 18                |           | Fair   |
| Eftekharian et al., 2016        | 7                       | 2                           |          | 3                      |          | 2                        | 14                |           | Poor   |
| Freire et al., 2017             | 7                       | 0                           |          | 1                      |          | 1                        | 9                 |           | Poor   |
| Gacka et al., 2010              | 6                       | 1                           |          | 3                      |          | 2                        | 12                |           | Poor   |
| Ip et al., 2016                 | 7                       | 1                           |          | 2                      |          | 0                        | 10                |           | Poor   |
| Jagannathan-Bogdan et al., 2016 | 5                       | 0                           |          | 3                      |          | 0                        | 8                 |           | Poor   |
| Lin et al., 2018                | 8                       | 3                           |          | 1                      |          | 2                        | 14                |           | Poor   |
| Malandrino et al., 2015         | 8                       | 2                           |          | 2                      |          | 2                        | 14                |           | Poor   |
| Moreno-Navarette et al., 2009   | 8                       | 3                           |          | 2                      |          | 1                        | 14                |           | Poor   |
| Mraz et al., 2011               | 9                       | 0                           |          | 2                      |          | 1                        | 12                |           | Poor   |
| Ozturk et al., 2013             | 7                       | 0                           |          | 2                      |          | 0                        | 9                 |           | Poor   |
| Shiny et al., 2014              | 10                      | 2                           |          | 3                      |          | 4                        | 19                |           | Fair   |
| Shurtz-Swirskeit et al., 2001   | 7                       | 0                           |          | 2                      |          | 0                        | 9                 |           | Poor   |
| Ulu et al., 2013                | 7                       | 1                           |          | 2                      |          | 1                        | 10                |           | Poor   |
| Vaidyula et al., 2006           | 7                       | 0                           |          | 2                      |          | 1                        | 10                |           | Poor   |
| Van deepen et al., 2017         | 7                       | 0                           |          | 2                      |          | 1                        | 10                |           | Poor   |
| Yang et al., 2012               | 8                       | 1                           |          | 2                      |          | 1                        | 12                |           | Poor   |
| Median (range)                  | 7 (5-10)                | 1 (0-3)                     |          | 2 (1-4)                |          | 1 (0-4)                  | 12 (8-19)         |           |        |
| Kappa [95% CI], % agreement     | 0.6 [0.08-1.0]<br>80.0% | 0.33 [-0.971-.00]<br>66.67% |          | 0.71 [0.15-1]<br>85.71 |          | 0.33 [-0.49-1]<br>66.67% |                   |           |        |

**Table 6Sb:** Quality scores, Kappa results assessed by ARRIVE guideline for animal studies.

| Domain                   | Introduction/4       | Methods/9                 | Results/4                 | Discussion score/3    | Overall score/20 | Rating |
|--------------------------|----------------------|---------------------------|---------------------------|-----------------------|------------------|--------|
| Dale Buras et al., 2015  | 4                    | 5                         | 1                         | 3                     | 13               | Fair   |
| Van Deepen et al., 2017  | 4                    | 9                         | 3                         | 3                     | 19               | Good   |
| Dror et al., 2017        | 4                    | 7                         | 2                         | 3                     | 16               | Good   |
| Hong et al., 2009        | 4                    | 5                         | 2                         | 3                     | 14               | Fair   |
| Jia et al., 2014         | 4                    | 9                         | 2                         | 3                     | 18               | Good   |
| Kimball et al., 2017     | 4                    | 5                         | 2                         | 2                     | 13               | Fair   |
| Lee et al., 2016         | 4                    | 7                         | 2                         | 3                     | 16               | Good   |
| Pratichizzo et al., 2018 | 4                    | 9                         | 2                         | 2                     | 17               | Good   |
| Median                   | 4 (4-4)              | 7 (5-9)                   | 2 (1-3)                   | 3 (2-3)               | 16 (13-19)       |        |
| %, Kappa value[95% CI]   | 100, K= 1[1.00-1.00] | 62.50, K= 0.25[0.47-0.97] | 87.50, K=0.75 [0.26-1.00] | 100, K= 1 [1.00-1.00] |                  |        |

**Table 6Sc:** Quality assessment of individual included studies in the review using the Joanna Briggs Institute (JBI) Critical Appraisal tools for use in JBI Systematic Reviews.

| Author, year             | 1              | 2                          | 3                          | 4                   | 5                         | 6                          | 7                          | 8                         | 9                         | Quality /9 | Comment |
|--------------------------|----------------|----------------------------|----------------------------|---------------------|---------------------------|----------------------------|----------------------------|---------------------------|---------------------------|------------|---------|
| Dale Buras et al., 2015  | 1              | 1                          | 1                          | 1                   | 1                         | 0                          | 1                          | 1                         | 1                         | 8          | Good    |
| Van Deepen et al., 2017  | 1              | 0                          | 0                          | 1                   | 1                         | 1                          | 1                          | 1                         | 1                         | 7          | Good    |
| Dror et al., 2017        | 1              | 1                          | 1                          | 1                   | 1                         | 1                          | 1                          | 1                         | 1                         | 9          | Good    |
| Hong et al., 2009        | 1              | 0                          | 1                          | 1                   | 0                         | 0                          | 1                          | 1                         | 1                         | 6          | Fair    |
| Jia et al., 2014         | 1              | 0                          | 1                          | 1                   | 1                         | 1                          | 1                          | 1                         | 1                         | 8          | Good    |
| Kimball et al., 2017     | 1              | 1                          | 0                          | 1                   | 0                         | 0                          | 0                          | 0                         | 1                         | 4          | Poor    |
| Lee et al., 2016         | 1              | 1                          | 0                          | 1                   | 1                         | 0                          | 1                          | 1                         | 1                         | 7          | Good    |
| Pratichizzo et al., 2018 | 1              | 1                          | 1                          | 1                   | 1                         | 1                          | 1                          | 1                         | 0                         | 8          | Good    |
| Median (range)           | 1 (1-1)        | 1(0-1)                     | 1 (0-1)                    | 1(1-1)              | 1(0-1)                    | 0.5(0-1)                   | 1 (0-1)                    | 1 (0-1)                   | 1 (0-1)                   | 7.5 (4-8)  |         |
| %, Kappa[95% CI]         | 100, K=1 [1-1] | 66.67, K=0.33 [-0.32-0.99] | 66.67, K=0.33 [-0.32-0.99] | 100, K= 1 [1.0-1.0] | 55.55, K=0.11[-0.58-0.80] | 66.67, K= 0.33[-0.32-0.99] | 88.89, K= 0.78 [0.34-1.00] | 88.89, K=0.78 [0.34-1.00] | 88.89, K=0.78 [0.34-1.00] |            |         |

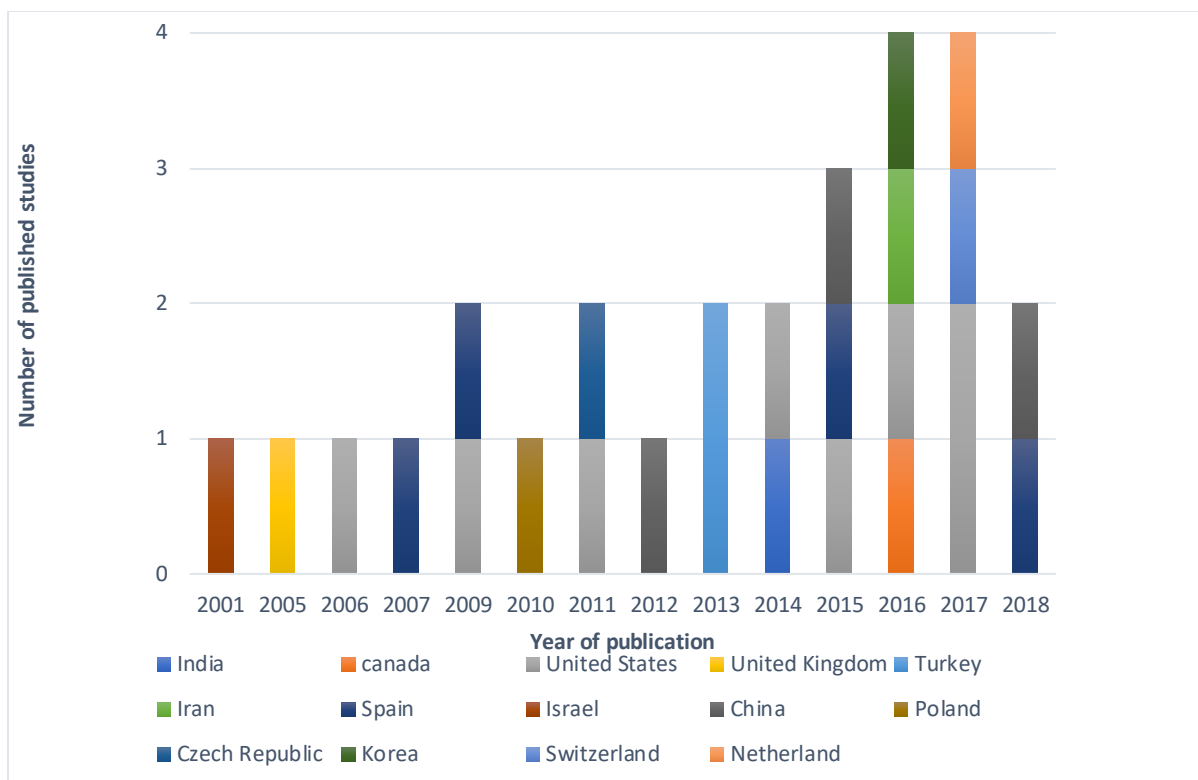

**Figure 1S:** Publication trends on monocyte activation and cardiovascular risk factors in T2DM

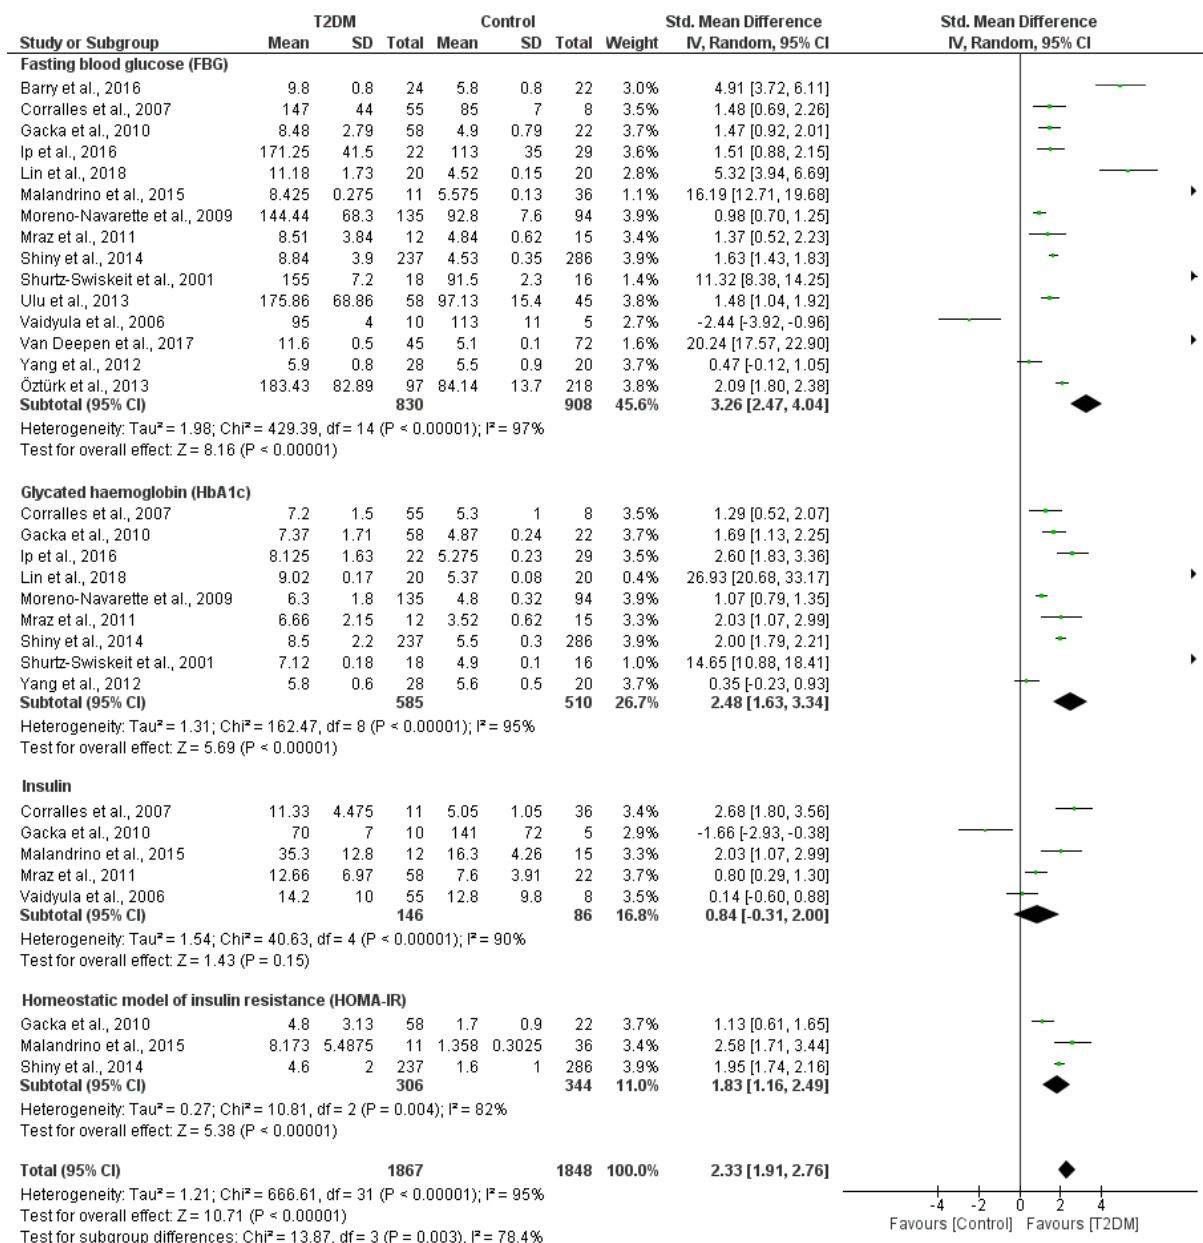

**Figure 2S:** Forest plot of glucose metabolism. Overall pooled estimate [SMD=1.94, 95% CI (1.52; 2.36),  $p < 0.00001$ ,  $\chi^2 = 1048.79$ ,  $I^2 = 96\%$ ,  $p < 0.0001$ ].

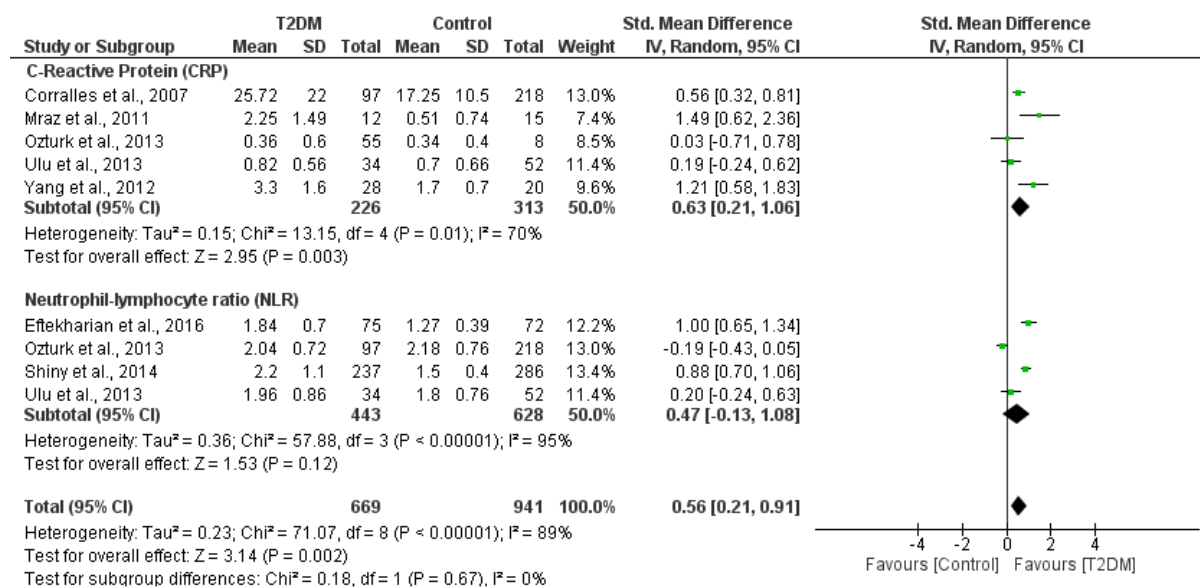

**Figure 3S:** Forest plot of Inflammatory markers in individuals with T2DM versus control.

#### A. Monocyte activation

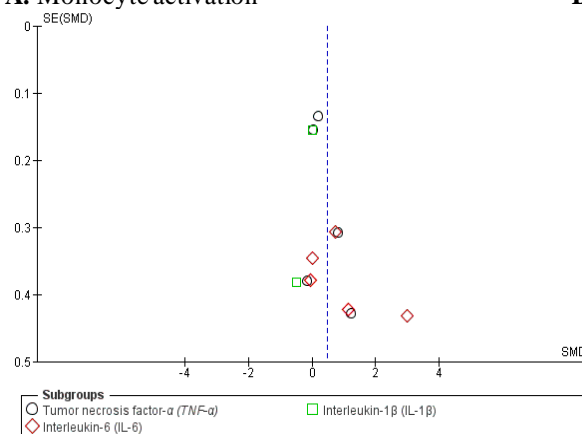

#### B. Cardiovascular risk factors

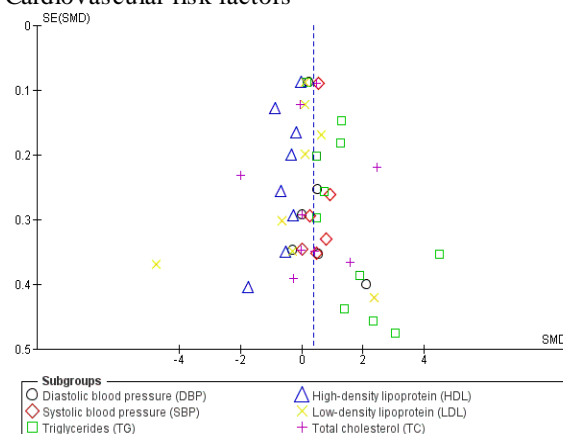

**Figure 4S:** Funnel plot of monocytes activation and cardiovascular risk factors showing perfect symmetry. Hence, there was no publication bias in these studies. Figure a: Monocyte activation, Figure b: Cardiovascular risk factors.
